# Supplementary material
Source: publisher site journal article supplement (https://static.cambridge.org/content/id/urn:cambridge.org:id:article:S1041610218001898/resource/name/S1041610218001898supp001.docx)
Supplement: Supplementary file 1 [file S1041610218001898supp001.docx]

Table S1. MEDLINE (July 18, 2016) Search Strategy

| **Search** | **Query** | **Results** |
| --- | --- | --- |
| 1 | "Alzheimer Disease"[Mesh] OR "Alzheimer Disease"[tiab] OR "Alzheimer's Disease"[tiab] OR Alzheimer*[tiab] OR "Dementia"[Mesh] OR “dementia”[tiab] | 193,401 |
| 2 | "Psychomotor Agitation"[Mesh] OR agitat*[tiab] OR agitated[tiab] OR disruptive[tiab] OR disruption[tiab] OR “Aggression”[Mesh] OR aggression[tiab] OR aggressive[tiab] OR distressed[tiab] OR restless*[tiab] OR fidget*[tiab] OR paced[tiab] OR “emotional distress”[tiab] OR “verbal aggression”[tiab] OR “physical aggression”[tiab] OR “aggressive behavior”[tiab] OR “aggressive behaviour”[tiab] OR “anxious behavior”[tiab] OR “anxious behaviour”[tiab] OR “excessive motor activity”[tiab] OR “yelling”[tiab] OR “screaming”[tiab] OR “shouting”[tiab] OR “pacing”[tiab] OR “rocking”[tiab] OR “gesturing”[tiab] OR “grabbing”[tiab] OR “shoving”[tiab] OR “pushing”[tiab] OR “resisting”[tiab] OR “scratching”[tiab] OR “biting”[tiab] | 357,879 |
| 3 | "disease progression"[Mesh] OR "disease progression"[tiab] OR "worsening condition"[tiab] OR "deterioration"[tiab] | 236,631 |
| 4 | "cost of illness"[MeSH Terms] OR “cost of illness”[tiab] OR “illness cost”[tiab] OR “illness costs”[tiab] OR “cost of disease”[tiab] OR “costs of disease”[tiab] OR “sickness cost”[tiab] OR “disease cost”[tiab] OR “disease costs”[tiab] OR “cost of sickness”[tiab] OR “sickness costs”[tiab] OR "Health Care Costs"[Mesh] OR "Drug Costs"[Mesh] OR "Hospital Costs"[Mesh] OR “nursing costs”[tiab] OR "Direct Service Costs"[Mesh] OR “indirect costs”[tiab] OR “medical care cost”[tiab] OR “medical care costs”[tiab] OR “cost of treatment”[tiab] OR “economic burden”[tiab] OR cost[tiab] OR costs[tiab] OR economic[tiab] OR economics[tiab] OR “cost-benefit-analysis”[tiab] OR “cost effectiveness”[tiab] OR “health service cost”[tiab] OR “health service costs”[tiab] OR pharmacoeconomic*[tiab] OR “Cost-Benefit Analysis”[Mesh] OR “socioeconomic factors”[Mesh] OR “socioeconomic status”[Mesh] | 888,029 |
| 5 | ((patient[tiab] OR patients[tiab] OR “patients”[Mesh] OR "Caregivers"[Mesh] OR caregiver[tiab] OR caregivers[tiab] OR "care giver"[tiab] OR "care givers"[tiab] OR guardian*[tiab] OR carer[tiab]) AND (burden*[tiab] OR cost*[tiab] OR economic*[tiab] OR socioeconomic*[tiab])) | 259,152 |
| 6 | Qaly[tiab] OR qalys[tiab] OR "Quality-Adjusted Life Years"[Mesh] OR “quality-adjusted life years”[tiab] OR “quality adjusted life year”[tiab] OR daly[tiab] OR dalys[tiab] OR “disability-adjusted life year”[tiab] OR “disability-adjusted life years”[tiab] OR “adjusted life years”[tiab] OR mortality[tiab] OR "Mortality"[Mesh] OR morbidity[tiab] OR "Morbidity"[Mesh] OR “burden of illness”[tiab] OR “burden of disease”[tiab] OR “illness burden”[tiab] OR “illness burdens”[tiab] OR “patient burden”[tiab] OR “caregiver burden”[tiab] OR "Quality of Life"[Mesh] OR “quality of life”[tiab] OR hrql[tiab] OR hrqol[tiab] OR qol[tiab] OR “years-of-life lost”[tiab] OR prevalence[tiab] OR incidence[tiab] OR “well being”[tiab] OR “Value of Life”[Mesh] or “Value of Life”[tiab] OR comorbid*[tiab] OR co-morbid[tiab] OR Comorbidity[MESH] | 2,176,377 |
| 7 | #1 AND #2 | 6,591 |
| 8 | #1 AND #2 AND #3 | 422 |
| 9 | #1 AND #2 AND #4 | 317 |
| 10 | #1 AND #2 AND (#5 OR #6) | 1,592 |
| 11 | #8 OR #9 OR #10 | 1,985 |
| 12 | Animals[Mesh] NOT human[Mesh] | 4,231,481 |
| 13 | #11 NOT #12 | 1937 |
| 14 | (Adult[MESH] OR Aged[MESH] OR “Middle Aged”[MESH] ) NOT (child[ti] OR children[ti] OR infant[ti] OR infants[ti] OR “young adult*”[ti] OR adolescent*[ti] OR pediatric*[ti] OR paediatric*[ti] OR schoolchild*[ti]) | 5,915,193 |
| 15 | #13 AND #14 | 1,370 |
| 16 | Editorial[Publication Type] OR Letter[Publication Type] OR Comment[Publication Type] | 1,493,848 |
| 17 | #15 NOT #16 | 1,358 |
| 18 | **#15 NOT #16 AND ("2006/01/01"[PDAT] : "2016/02/22"[PDAT]) AND English[lang]** | 714 |

Table S2. Embase (July 19, 2016) Search Strategy

| **Search** | **Query** | **Results** |
| --- | --- | --- |
| 1 | 'Alzheimer disease'/exp OR ‘Alzheimer Disease’:ab,ti OR ‘Alzheimer`s Disease’:ab,ti OR Alzheimer*:ab,ti  OR ‘dementia’/exp OR ‘dementia’:ab,ti | 302,526 |
| 2 | 'agitation'/exp OR 'restlessness'/exp OR agitat*:ab,ti OR agitated:ab,ti OR disruptive:ab,ti OR disruption:ab,ti OR 'aggression'/exp OR aggression:ab,ti OR aggressive:ab,ti OR distressed:ab,ti OR restless*:ab,ti OR fidget*:ab,ti OR paced:ab,ti OR ‘emotional distress’:ab,ti OR ‘verbal aggression’:ab,ti OR ‘physical aggression’:ab,ti OR ‘aggressive behavior’:ab,ti OR ‘aggressive behaviour’:ab,ti OR ‘anxious behavior’:ab,ti OR ‘anxious behaviour’:ab,ti OR ‘excessive motor activity’:ab,ti OR ‘yelling’:ab,ti OR ‘screaming’:ab,ti OR ‘shouting’:ab,ti OR ‘pacing’:ab,ti OR ‘rocking’:ab,ti OR ‘gesturing’:ab,ti OR ‘grabbing’:ab,ti OR ‘shoving’:ab,ti OR ‘pushing’:ab,ti OR ‘resisting’:ab,ti OR ‘scratching’:ab,ti OR ‘biting’:ab,ti | 507,356 |
| 3 | 'disease course'/exp OR ‘disease progression’:ab,ti OR ‘worsening condition’:ab,ti OR ‘deterioration’:ab,ti | 2,526,657 |
| 4 | 'cost of illness'/exp OR 'cost of illness':ab,ti OR 'illness cost':ab,ti OR 'illness costs':ab,ti OR 'cost of disease':ab,ti OR 'costs of disease':ab,ti OR 'sickness cost':ab,ti OR 'disease cost':ab,ti OR 'disease costs':ab,ti OR 'cost of sickness':ab,ti OR 'sickness costs':ab,ti OR 'health care cost'/exp OR 'drug cost'/exp OR 'hospital cost'/exp OR 'nursing cost'/exp OR 'direct costs':ab,ti OR 'indirect costs':ab,ti OR ‘medical care cost’:ab,ti OR ‘medical care costs’:ab,ti OR ‘cost of treatment’:ab,ti OR ‘economic burden’ OR cost:ti,ab OR costs:ti,ab OR economic:ab,ti OR economics:ab,ti OR 'cost-benefit-analysis':ab,ti OR 'cost effectiveness':ab,ti OR ‘health service cost’:ab,ti OR ‘health service costs’:ab,ti OR pharmacoeconomic*:ab,ti OR ‘Cost-Benefit Analysis’/exp OR ‘socioeconomics’/exp OR ‘social status’/exp | 1,020,517 |
| 5 | ((patient:ab,ti OR patients*:ab,ti OR 'patient'/exp OR ‘Caregiver’/exp OR caregiver:ab,ti OR caregivers:ab,ti OR ‘care giver’:ab,ti OR ‘care givers’:ab,ti OR guardian*:ab,ti OR ‘carer’:ab,ti) AND (burden*:ab,ti OR cost*:ab,ti OR economic*:ab,ti OR socioeconomic*:ab,ti)) OR ‘caregiver burden’/exp | 402,561 |
| 6 | qaly:ab,ti OR qalys:ab,ti OR 'quality-adjusted life year':ab,ti OR 'quality-adjusted life years':ab,ti OR 'quality adjusted life year'/exp OR daly:ab,ti OR dalys:ab,ti OR 'disability-adjusted life year':ab,ti OR 'disability-adjusted life years':ab,ti OR 'adjusted life years':ab,ti OR mortality:ab,ti OR 'mortality'/exp OR morbidity:ab,ti OR 'morbidity'/exp OR 'burden of illness':ab,ti OR 'burden of disease':ab,ti OR 'illness burden':ab,ti OR 'illness burdens':ab,ti OR 'patient burden':ab,ti OR 'burden on patient':ab,ti OR 'caregiver burden':ab,ti OR 'burden on caregiver':ab,ti OR 'quality of life'/exp OR 'quality of life':ab,ti OR hrql:ab,ti OR hrqol:ab,ti OR qol:ab,ti OR 'years-of-life lost':ab,ti OR prevalence:ab,ti OR incidence:ab,ti OR 'wellbeing'/exp OR 'well being':ab,ti OR ‘Value of Life’:ab,ti OR comorbid*:ab,ti OR co-morbid:ab,ti OR ‘Comorbidity’/exp | 2,901,582 |
| 7 | #1 AND #2 | 12,533 |
| 8 | #1 AND #2 AND #3 | 2,171 |
| 9 | #1 AND #2 AND #4 | 562 |
| 10 | #1 AND #2 AND (#5 OR #6) | 3290 |
| 11 | #8 OR #9 OR #10 | 4883 |
| 12 | ‘animal'/exp NOT 'human'/exp | 4,695,080 |
| 13 | #11 NOT #12 | 4710 |
| 14 | ('adult'/exp OR 'aged'/exp OR 'middle aged'/exp) NOT (child:ti OR children:ti OR infant:ti OR infants:ti OR ‘young adult*’:ti OR adolescent*:ti OR pediatric*:ti OR paediatric*:ti OR schoolchild*:ti) | 5,942,091 |
| 15 | #13 AND #14 | 2,265 |
| 16 | #15 NOT ([editorial]/lim OR [erratum]/lim OR [letter]/lim OR [note]/lim OR [short survey]/lim OR [conference abstract]/lim OR [conference paper]/lim OR [conference review]/lim) | 1,933 |
| 17 | **#16 AND [English]/lim AND [2006-2016]/py** | **1,135** |
